# Supplementary material for: Correlation between sustained-load and fatigue crack growth in high-strength steels
Source: Royal Society of Chemistry journal article supplement (doi:10.1039/b910466f), 1969-07-01
Supplement: b910466f.pdf [file b910466f.pdf]

## Supplementary material

### Bis(2-pyridyl)ditelluride, bis(3-methyl-2-pyridyl)ditelluride and their telluroate complexes of zinc, cadmium, mercury: Synthesis, characterization and their conversion to metal telluride nanoparticles

G. Kedarnath, Vimal K. Jain,\* Amey Wadawale and Gautam K. Dey

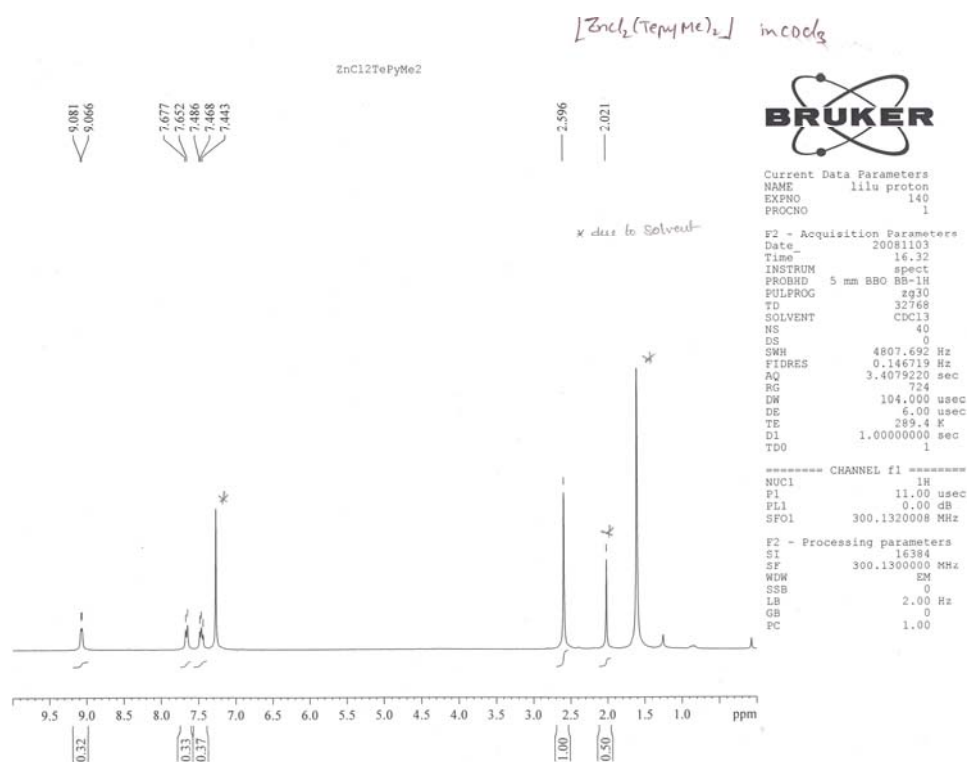

**Fig. 1**  $^1H$  NMR spectrum of  $[ZnCl_2\{Te_2(pyMe)_2\}]$ .

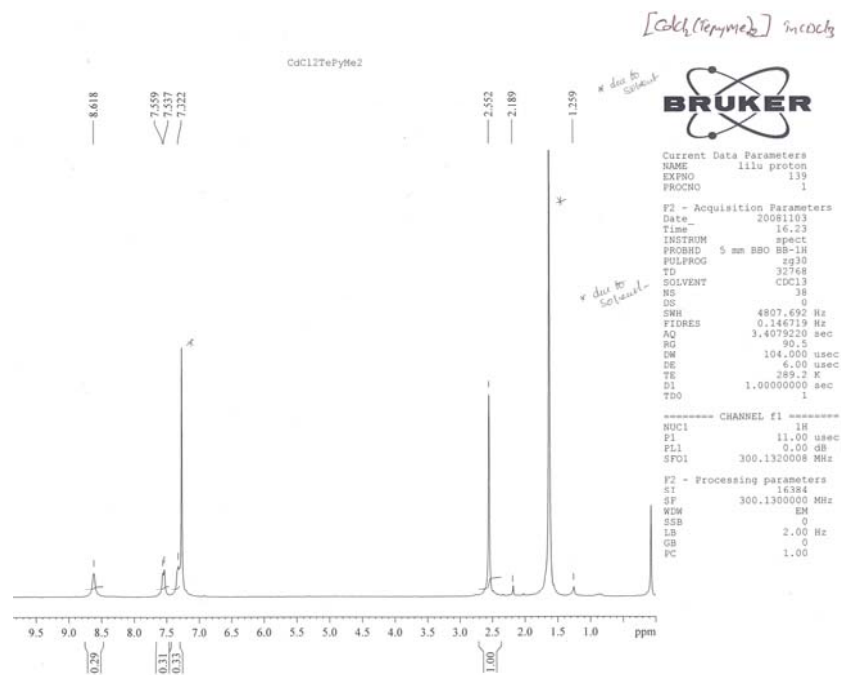

**Fig. 2** <sup>1</sup>H NMR spectrum of [CdCl<sub>2</sub>{Te<sub>2</sub>(pyMe)<sub>2</sub>}].

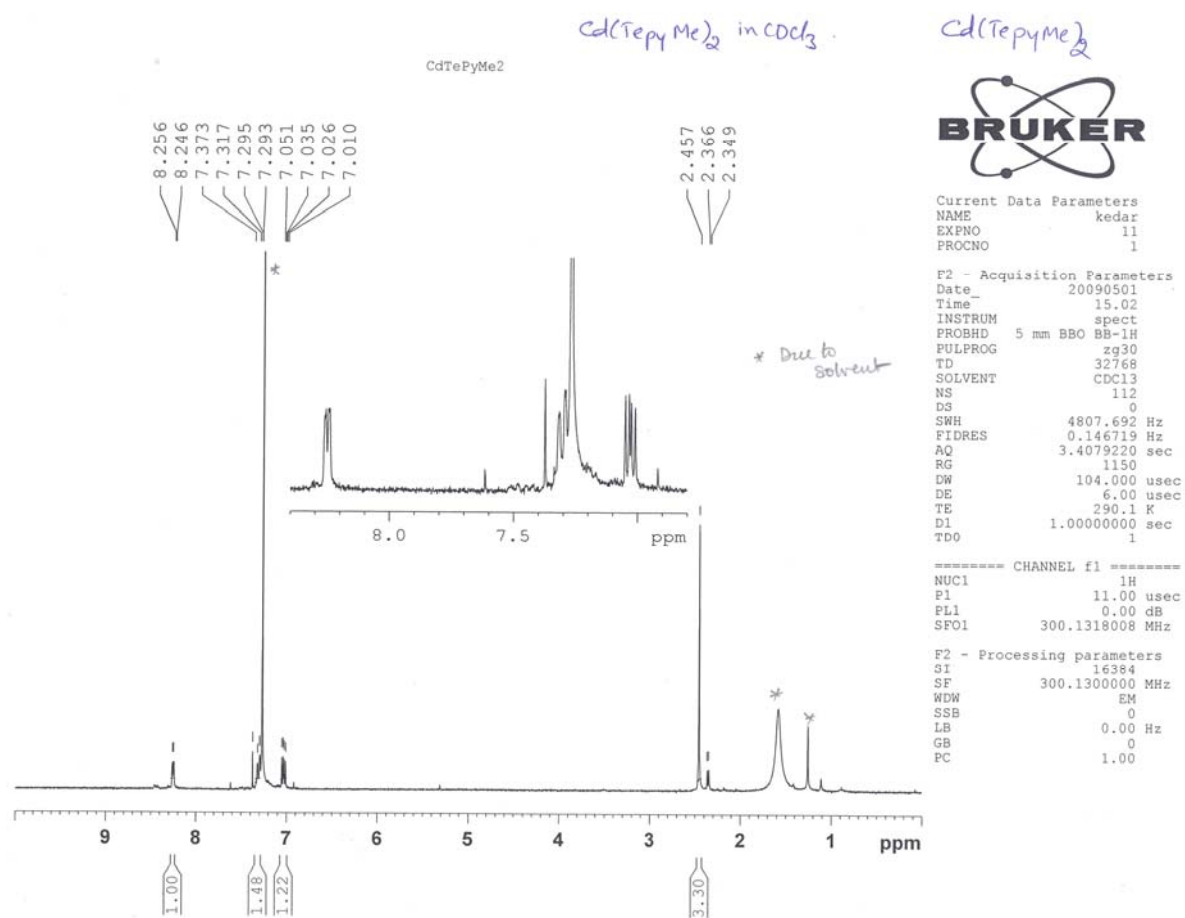

**Fig. 3** <sup>1</sup>H NMR spectrum of [Cd(TepyMe)<sub>2</sub>].

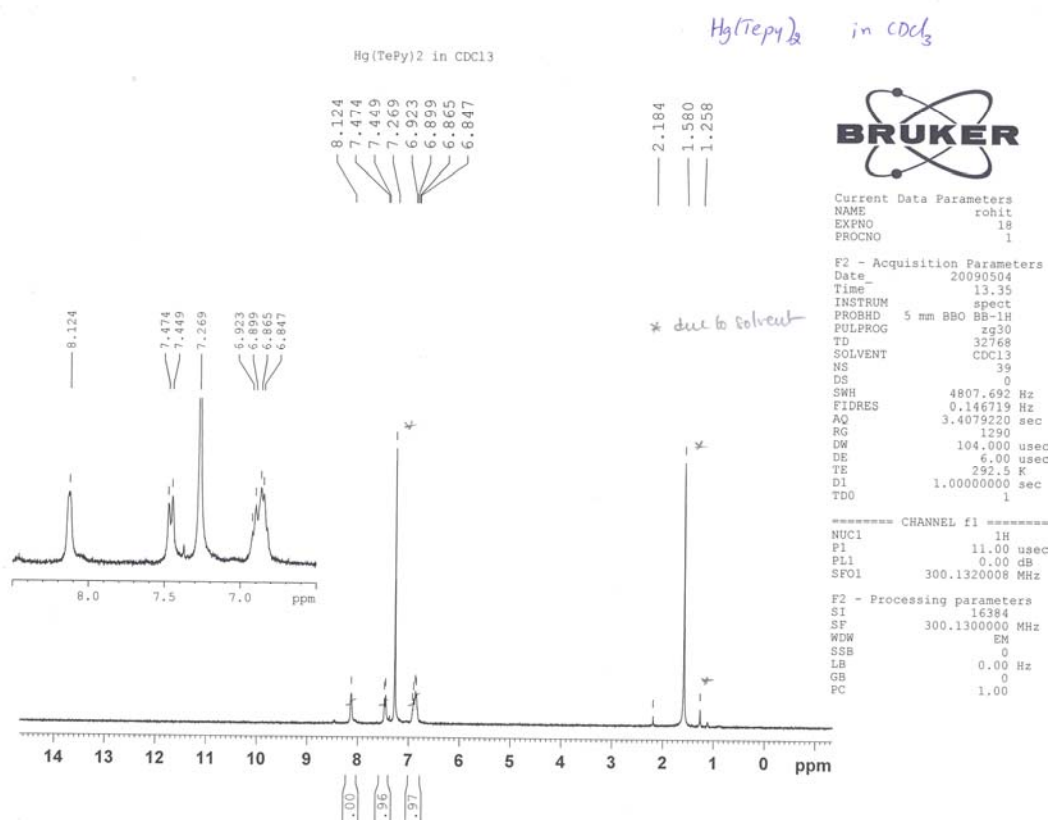

**Fig. 4** <sup>1</sup>H NMR spectrum of [Hg(Tepy)<sub>2</sub>].

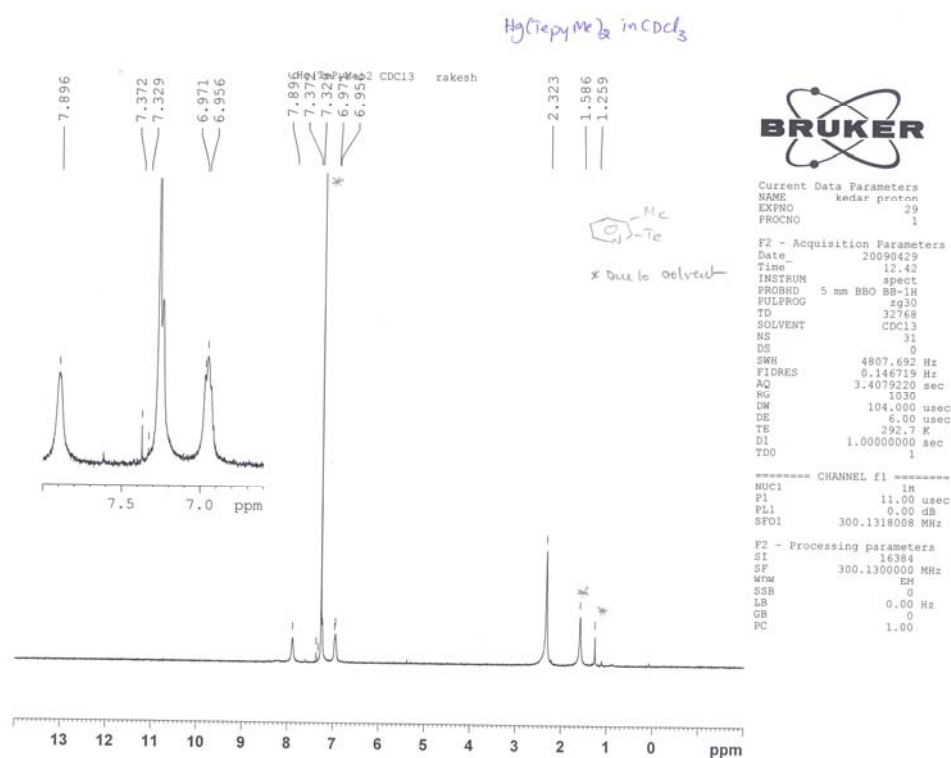

**Fig. 5**  $^1\text{H}$  NMR spectrum of  $[\text{Hg}(\text{TepyMe})_2]$ .

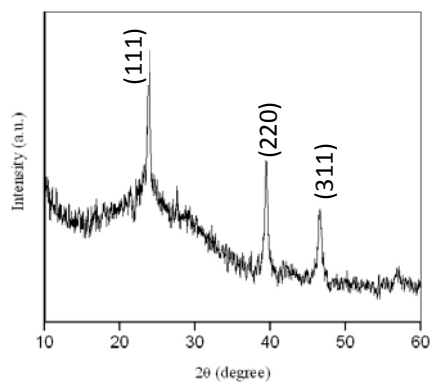

**Fig. 6** CdTe nanoparticles obtained by the pyrolysis of  $[\text{Cd}(\text{Tepy})_2]$  at 350 °C in a furnace for 1h.

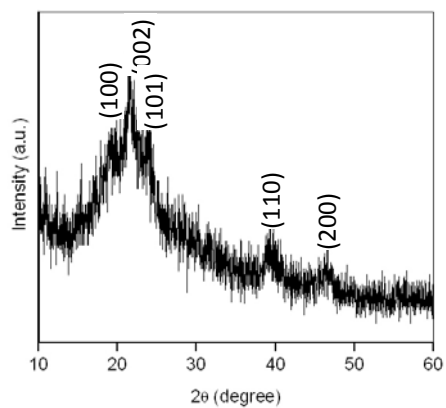

**Fig. 7** CdTe nanoparticles obtained by the pyrolysis of  $[\text{Cd}(\text{Tepy})_2]$  in HDA at  $160^\circ\text{C}$  for 20 min.

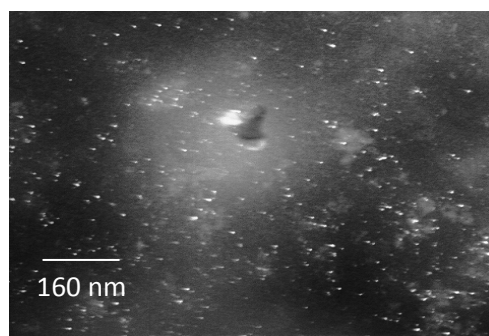

**Fig. 8** TEM image of CdTe nanoparticles obtained by the pyrolysis of  $[\text{Cd}(\text{Tepy})_2]$  in HDA at 160 °C for 20 min.

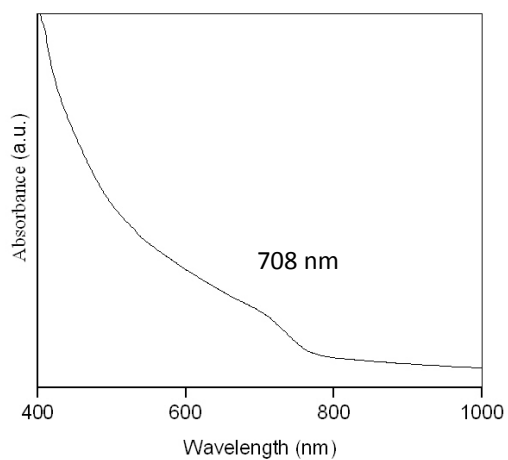

**Fig. 9** Absorption spectrum of CdTe nanoparticles obtained by the pyrolysis of  $[\text{Cd}(\text{Tepy})_2]$  in HDA at 160 °C for 20 min.



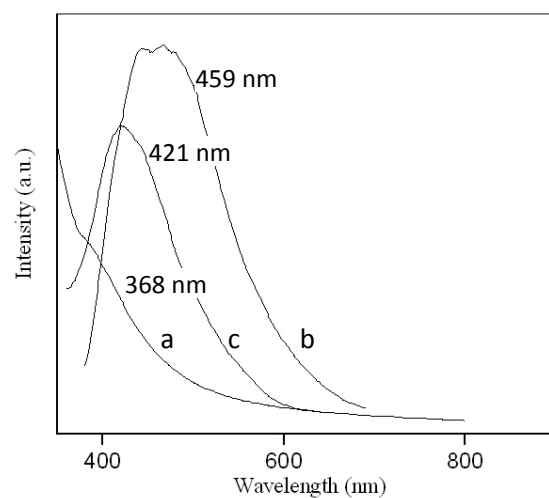

**Fig. 10** a) Absorption, b) emission spectra of CdTe nanoparticles obtained by the pyrolysis of  $[\text{Cd}(\text{Tepy})_2]$  in TOPO (2 g) at 160 °C for 20 min (**experiment 2**) and c) emission spectrum of CdTe nanoparticles recapped with TGA.

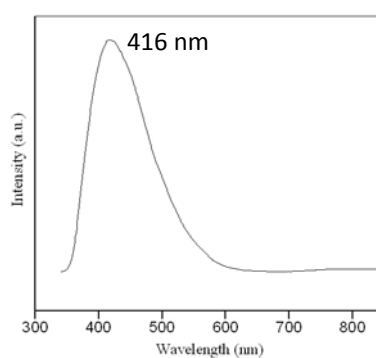

**Fig. 11** Emission spectrum of CdTe nanoparticles obtained by the pyrolysis of  $[\text{Cd}(\text{Tepy})_2]$  in HDA/TOPO at 160 °C for 20 min (**experiment 4**).

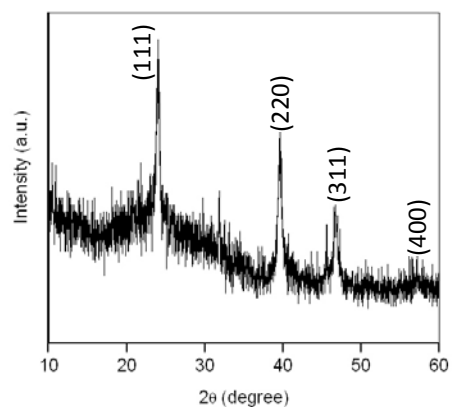

**Fig. 12** XRD pattern of HgTe obtained by the pyrolysis of  $[\text{Hg}(\text{pyTe})_2]$  in a furnace at  $175\text{ }^\circ\text{C}$  for 1 h.

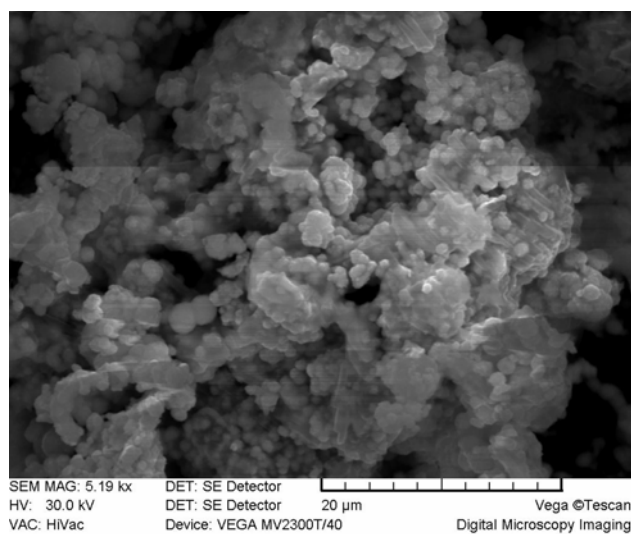

**Fig. 13** SEM picture of HgTe obtained by the pyrolysis of  $[\text{Hg}(\text{pyTe})_2]$  in a furnace at  $175\text{ }^\circ\text{C}$  for 1 h.

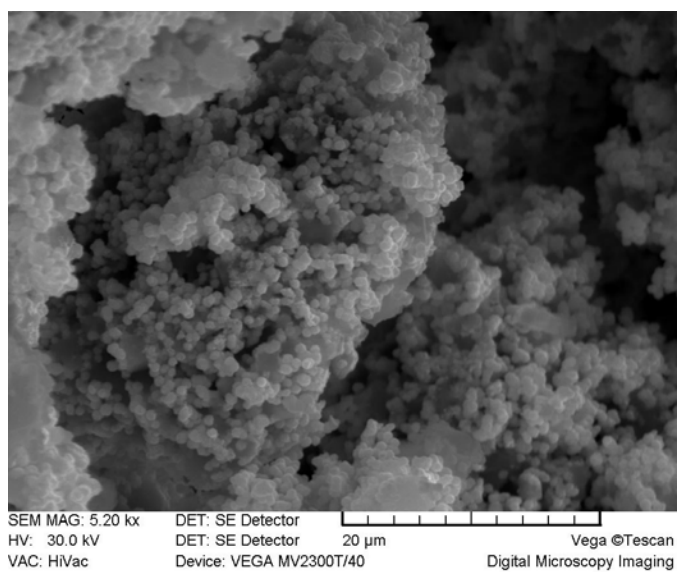

**Fig. 14** SEM picture of HgTe obtained by the pyrolysis of [Hg(TepyMe)<sub>2</sub>] in a furnace at 250 °C for 1 h.

## Crystal information (.cif) for [ZnCl<sub>2</sub>(TepyMe)<sub>2</sub>].CH<sub>3</sub>CN (1b)

data\_gk-08

```
_audit_creation_method          SHELXL-97
_chemical_name_systematic
;
?
;
_chemical_name_common           ?
_chemical_melting_point         ?
_chemical_formula_moiety        'Cl2 H12 Cl2 N2 Te2 Zn, C2 H3 N1'
_chemical_formula_sum           'C14 H15 Cl2 N3 Te2 Zn'
_chemical_formula_weight        616.76

loop_
  _atom_type_symbol
  _atom_type_description
  _atom_type_scatter_dispersion_real
  _atom_type_scatter_dispersion_imag
  _atom_type_scatter_source
  'C' 'C' 0.0033 0.0016
  'International Tables Vol C Tables 4.2.6.8 and 6.1.1.4'
  'H' 'H' 0.0000 0.0000
  'International Tables Vol C Tables 4.2.6.8 and 6.1.1.4'
  'N' 'N' 0.0061 0.0033
  'International Tables Vol C Tables 4.2.6.8 and 6.1.1.4'
  'Cl' 'Cl' 0.1484 0.1585
  'International Tables Vol C Tables 4.2.6.8 and 6.1.1.4'
  'Te' 'Te' -0.5308 1.6751
  'International Tables Vol C Tables 4.2.6.8 and 6.1.1.4'
  'Zn' 'Zn' 0.2839 1.4301
  'International Tables Vol C Tables 4.2.6.8 and 6.1.1.4'

_symmetry_cell_setting          orthorhombic
_symmetry_space_group_name_H-M  'P n a 21'
_symmetry_space_group_name_Hall 'P 2c -2n'
_symmetry_Int_Tables_number     33

loop_
  _symmetry_equiv_pos_as_xyz
  'x, y, z'
  '-x+1/2, y+1/2, z+1/2'
  'x+1/2, -y+1/2, z'
  '-x, -y, z+1/2'

_cell_length_a                  16.623(4)
_cell_length_b                  12.130(3)
_cell_length_c                  9.540(2)
_cell_angle_alpha               90.00
_cell_angle_beta               90.00
_cell_angle_gamma               90.00
_cell_volume                    1923.5(7)
_cell_formula_units_Z           4
_cell_measurement_temperature   298(2)
_cell_measurement_reflns_used   25
_cell_measurement_theta_min     10.0
_cell_measurement_theta_max     13.7
```

```
_exptl_crystal_description      'needle'  
_exptl_crystal_colour          'red'  
_exptl_crystal_size_max       0.20  
_exptl_crystal_size_mid       0.02  
_exptl_crystal_size_min       0.02  
_exptl_crystal_density_meas   ?  
_exptl_crystal_density_diffn  2.130  
_exptl_crystal_density_method 'not measured'  
_exptl_crystal_F_000          1152  
_exptl_absorpt_coefficient_mu  4.526  
_exptl_absorpt_correction_type psi-scan  
_exptl_absorpt_process_details '(North, Phillips & Mathews, 1968)'  
_exptl_absorpt_correction_T_min 0.4647  
_exptl_absorpt_correction_T_max 0.9149
```

\_exptl\_special\_details

```
;  
?  
;
```

```
_diffn_ambient_temperature    298(2)  
_diffn_radiation_wavelength   0.71069  
_diffn_radiation_type         MoK $\alpha$   
_diffn_radiation_source       'fine-focus sealed tube'  
_diffn_radiation_monochromator graphite  
_diffn_measurement_device_type 'Rigaku AFC7S'  
_diffn_measurement_method     \w-2\q  
_diffn_detector_area_resol_mean ?  
_diffn_standards_number       3  
_diffn_standards_interval_count 150  
_diffn_standards_decay_%      -8.23  
_diffn_reflns_number          3366  
_diffn_reflns_av_R_equivalents 0.0349  
_diffn_reflns_av_sigmaI/netI  0.1062  
_diffn_reflns_limit_h_min     0  
_diffn_reflns_limit_h_max     21  
_diffn_reflns_limit_k_min     -8  
_diffn_reflns_limit_k_max     15  
_diffn_reflns_limit_l_min     -6  
_diffn_reflns_limit_l_max     12  
_diffn_reflns_theta_min       2.72  
_diffn_reflns_theta_max       27.51  
_reflns_number_total          2678  
_reflns_number_gt             1506  
_reflns_threshold_expression  >2sigma(I)
```

```
_computing_data_collection     'WinAFC'  
_computing_cell_refinement     'WinAFC'  
_computing_data_reduction      'CrystalStructure'  
_computing_structure_solution  'SIR92'  
_computing_structure_refinement 'SHELXL-97 (Sheldrick, 1997)'  
_computing_molecular_graphics  'ORTEP 3 for Windows'  
_computing_publication_material 'WinGX 1.70.01'
```

\_refine\_special\_details

```
;  
Refinement of  $F^2$  against ALL reflections. The weighted R-factor wR and  
goodness of fit S are based on  $F^2$ , conventional R-factors R are based  
on F, with F set to zero for negative  $F^2$ . The threshold expression of
```

$F^2 > 2\sigma(F^2)$  is used only for calculating R-factors(gt) etc. and is not relevant to the choice of reflections for refinement. R-factors based on  $F^2$  are statistically about twice as large as those based on  $F$ , and R-factors based on ALL data will be even larger.

;

```
_refine_ls_structure_factor_coef Fsqd
_refine_ls_matrix_type full
_refine_ls_weighting_scheme calc
_refine_ls_weighting_details
'calc w=1/[\s^2^(Fo^2^)+(0.1073P)^2^+0.0000P] where P=(Fo^2^+2Fc^2^)/3'
_atom_sites_solution_primary direct
_atom_sites_solution_secondary difmap
_atom_sites_solution_hydrogens geom
_refine_ls_hydrogen_treatment constr
_refine_ls_extinction_method none
_refine_ls_extinction_coef ?
_refine_ls_abs_structure_details
'Flack H D (1983), Acta Cryst. A39, 876-881'
_refine_ls_abs_structure_Flack 0.38(8)
_refine_ls_number_reflns 2678
_refine_ls_number_parameters 184
_refine_ls_number_restraints 3
_refine_ls_R_factor_all 0.1423
_refine_ls_R_factor_gt 0.0613
_refine_ls_wR_factor_ref 0.1864
_refine_ls_wR_factor_gt 0.1505
_refine_ls_goodness_of_fit_ref 0.985
_refine_ls_restrained_S_all 0.985
_refine_ls_shift/su_max 0.000
_refine_ls_shift/su_mean 0.000
```

loop\_

```
_atom_site_label
_atom_site_type_symbol
_atom_site_fract_x
_atom_site_fract_y
_atom_site_fract_z
_atom_site_U_iso_or_equiv
_atom_site_adp_type
_atom_site_occupancy
_atom_site_symmetry_multiplicity
_atom_site_calc_flag
_atom_site_refinement_flags
_atom_site_disorder_assembly
_atom_site_disorder_group
C8 C 0.3269(13) 0.0894(19) 0.239(2) 0.042(5) Uani 1 1 d . . .
H9 H 0.3793 0.0704 0.2634 0.051 Uiso 1 1 calc R . .
C7 C 0.2822(15) 0.018(2) 0.156(2) 0.052(6) Uani 1 1 d . . .
C12 C 0.3184(13) -0.088(2) 0.100(3) 0.053(6) Uani 1 1 d . . .
H6A H 0.3731 -0.0947 0.1315 0.079 Uiso 1 1 calc R . .
H6B H 0.3170 -0.0878 -0.0003 0.079 Uiso 1 1 calc R . .
H6C H 0.2878 -0.1499 0.1345 0.079 Uiso 1 1 calc R . .
C13 C -0.4421(17) -0.077(2) 0.162(4) 0.099(12) Uani 1 1 d D . .
H29A H -0.4895 -0.0553 0.2126 0.149 Uiso 1 1 calc R . .
H29B H -0.4455 -0.1537 0.1387 0.149 Uiso 1 1 calc R . .
H29C H -0.4381 -0.0342 0.0774 0.149 Uiso 1 1 calc R . .
C14 C -0.3706(17) -0.057(3) 0.249(3) 0.120 Uani 1 1 d D . .
Zn1 Zn 0.06013(14) 0.21049(18) 0.1289(3) 0.0367(6) Uani 1 1 d . . .
N1 N -0.0486(11) 0.1393(14) 0.0639(15) 0.039(4) Uani 1 1 d . . .
C12 Cl 0.0208(3) 0.2819(5) 0.3343(7) 0.0618(18) Uani 1 1 d . . .
```

C11 C1 0.0880(4) 0.3242(5) -0.0483(7) 0.0671(19) Uani 1 1 d . . .  
C5 C -0.1031(12) 0.2063(18) -0.007(3) 0.048(6) Uani 1 1 d . . .  
H5 H -0.0868 0.2762 -0.0349 0.058 Uiso 1 1 calc R . .  
C3 C -0.1979(15) 0.0680(18) -0.002(3) 0.059(7) Uani 1 1 d . . .  
H3 H -0.2491 0.0432 -0.0251 0.071 Uiso 1 1 calc R . .  
C4 C -0.1751(14) 0.175(2) -0.034(3) 0.068(8) Uani 1 1 d . . .  
H4 H -0.2117 0.2234 -0.0742 0.081 Uiso 1 1 calc R . .  
C11 C -0.156(2) -0.110(2) 0.089(3) 0.088 Uani 1 1 d . . .  
H11A H -0.1293 -0.1515 0.0174 0.132 Uiso 1 1 calc R . .  
H11B H -0.2125 -0.1262 0.0875 0.132 Uiso 1 1 calc R . .  
H11C H -0.1341 -0.1280 0.1788 0.132 Uiso 1 1 calc R . .  
C2 C -0.1454(14) -0.0010(18) 0.064(2) 0.041(5) Uani 1 1 d . . .  
N3 N -0.299(2) -0.045(2) 0.300(4) 0.139 Uani 1 1 d D . .  
Te2 Te 0.12822(10) -0.04810(13) -0.00222(17) 0.0545(5) Uani 1 1 d . . .  
Te1 Te 0.01463(10) -0.06768(12) 0.19672(18) 0.0581(5) Uani 1 1 d . . .  
C1 C -0.0733(13) 0.0356(15) 0.096(2) 0.033(4) Uani 1 1 d . . .  
N2 N 0.1724(9) 0.1448(13) 0.1738(18) 0.039(4) Uani 1 1 d . . .  
C6 C 0.2057(16) 0.0510(16) 0.126(3) 0.056(7) Uani 1 1 d . . .  
C9 C 0.2973(13) 0.1820(14) 0.2843(19) 0.032(5) Uani 1 1 d . . .  
H10 H 0.3284 0.2303 0.3371 0.038 Uiso 1 1 calc R . .  
C10 C 0.2200(15) 0.2062(18) 0.252(2) 0.046(6) Uani 1 1 d . . .  
H11 H 0.1987 0.2711 0.2884 0.055 Uiso 1 1 calc R . .

loop\_

\_atom\_site\_aniso\_label  
\_atom\_site\_aniso\_U\_11  
\_atom\_site\_aniso\_U\_22  
\_atom\_site\_aniso\_U\_33  
\_atom\_site\_aniso\_U\_23  
\_atom\_site\_aniso\_U\_13  
\_atom\_site\_aniso\_U\_12  
C8 0.038(12) 0.069(15) 0.020(11) -0.015(10) -0.018(9) 0.001(11)  
C7 0.062(16) 0.063(15) 0.031(14) 0.000(11) -0.003(12) 0.009(13)  
C12 0.037(13) 0.069(16) 0.053(16) -0.008(13) -0.007(11) 0.004(12)  
C13 0.08(2) 0.08(2) 0.13(3) 0.01(2) -0.04(2) -0.007(17)  
C14 0.131 0.128 0.103 0.049 0.059 0.088  
Zn1 0.0406(13) 0.0347(12) 0.0349(13) -0.0038(11) -0.0026(12) 0.0029(11)  
N1 0.063(12) 0.038(10) 0.017(8) 0.003(7) -0.009(8) 0.005(9)  
C12 0.045(3) 0.086(5) 0.054(4) -0.028(3) 0.000(3) 0.022(3)  
C11 0.063(4) 0.068(4) 0.071(5) 0.035(4) 0.001(3) -0.010(3)  
C5 0.026(11) 0.053(13) 0.066(15) 0.014(14) 0.023(13) 0.015(10)  
C3 0.063(16) 0.067(17) 0.049(14) -0.023(16) 0.017(15) -0.003(13)  
C4 0.044(15) 0.054(15) 0.11(2) -0.028(16) -0.010(16) 0.015(12)  
C11 0.138 0.075 0.051 -0.027 -0.030 0.070  
C2 0.051(14) 0.037(12) 0.034(12) -0.008(10) -0.016(11) -0.021(11)  
N3 0.207 0.106 0.105 0.045 -0.025 0.00(2)  
Te2 0.0606(10) 0.0523(9) 0.0506(9) -0.0239(8) -0.0170(9) 0.0164(8)  
Te1 0.0661(11) 0.0491(9) 0.0591(11) 0.0182(9) -0.0182(10) -0.0091(8)  
C1 0.045(12) 0.034(11) 0.019(9) 0.010(9) -0.005(8) -0.005(10)  
N2 0.036(9) 0.049(10) 0.032(10) -0.014(8) 0.018(8) -0.013(8)  
C6 0.071(16) 0.033(12) 0.063(16) -0.037(12) 0.007(14) 0.003(12)  
C9 0.051(13) 0.019(10) 0.025(11) -0.010(8) -0.012(10) -0.010(10)  
C10 0.072(17) 0.048(13) 0.017(10) 0.003(10) -0.002(12) -0.002(12)

\_geom\_special\_details

;

All esds (except the esd in the dihedral angle between two l.s. planes) are estimated using the full covariance matrix. The cell esds are taken into account individually in the estimation of esds in distances, angles and torsion angles; correlations between esds in cell parameters are only

used when they are defined by crystal symmetry. An approximate (isotropic) treatment of cell esds is used for estimating esds involving l.s. planes.  
;

```
loop_
  _geom_bond_atom_site_label_1
  _geom_bond_atom_site_label_2
  _geom_bond_distance
  _geom_bond_site_symmetry_2
  _geom_bond_publ_flag
C8 C9 1.30(3) . ?
C8 C7 1.39(3) . ?
C8 H9 0.9300 . ?
C7 C6 1.36(3) . ?
C7 C12 1.52(3) . ?
C12 H6A 0.9600 . ?
C12 H6B 0.9600 . ?
C12 H6C 0.9600 . ?
C13 C14 1.472(19) . ?
C13 H29A 0.9600 . ?
C13 H29B 0.9600 . ?
C13 H29C 0.9600 . ?
C14 N3 1.299(19) . ?
Zn1 N2 2.075(17) . ?
Zn1 N1 2.097(18) . ?
Zn1 C11 2.230(6) . ?
Zn1 C12 2.240(6) . ?
N1 C1 1.36(2) . ?
N1 C5 1.39(2) . ?
C5 C4 1.28(3) . ?
C5 H5 0.9300 . ?
C3 C2 1.36(3) . ?
C3 C4 1.38(3) . ?
C3 H3 0.9300 . ?
C4 H4 0.9300 . ?
C11 C2 1.35(4) . ?
C11 H11A 0.9600 . ?
C11 H11B 0.9600 . ?
C11 H11C 0.9600 . ?
C2 C1 1.31(3) . ?
Te2 C6 2.15(2) . ?
Te2 Te1 2.688(3) . ?
Te1 C1 2.152(19) . ?
N2 C10 1.32(2) . ?
N2 C6 1.34(2) . ?
C9 C10 1.35(3) . ?
C9 H10 0.9300 . ?
C10 H11 0.9300 . ?

loop_
  _geom_angle_atom_site_label_1
  _geom_angle_atom_site_label_2
  _geom_angle_atom_site_label_3
  _geom_angle
  _geom_angle_site_symmetry_1
  _geom_angle_site_symmetry_3
  _geom_angle_publ_flag
C9 C8 C7 122(2) . . ?
C9 C8 H9 119.2 . . ?
C7 C8 H9 119.2 . . ?
```



C6 C7 C8 116(2) . . ?  
C6 C7 C12 123(2) . . ?  
C8 C7 C12 121(2) . . ?  
C7 C12 H6A 109.5 . . ?  
C7 C12 H6B 109.5 . . ?  
H6A C12 H6B 109.5 . . ?  
C7 C12 H6C 109.5 . . ?  
H6A C12 H6C 109.5 . . ?  
H6B C12 H6C 109.5 . . ?  
C14 C13 H29A 109.5 . . ?  
C14 C13 H29B 109.5 . . ?  
H29A C13 H29B 109.5 . . ?  
C14 C13 H29C 109.5 . . ?  
H29A C13 H29C 109.5 . . ?  
H29B C13 H29C 109.5 . . ?  
N3 C14 C13 167(4) . . ?  
N2 Zn1 N1 132.7(6) . . ?  
N2 Zn1 C11 102.0(5) . . ?  
N1 Zn1 C11 102.1(5) . . ?  
N2 Zn1 C12 103.4(5) . . ?  
N1 Zn1 C12 99.6(5) . . ?  
C11 Zn1 C12 119.0(3) . . ?  
C1 N1 C5 117.0(18) . . ?  
C1 N1 Zn1 125.1(13) . . ?  
C5 N1 Zn1 117.6(14) . . ?  
C4 C5 N1 122(2) . . ?  
C4 C5 H5 118.9 . . ?  
N1 C5 H5 118.9 . . ?  
C2 C3 C4 120(2) . . ?  
C2 C3 H3 119.9 . . ?  
C4 C3 H3 119.9 . . ?  
C5 C4 C3 119(3) . . ?  
C5 C4 H4 120.4 . . ?  
C3 C4 H4 120.4 . . ?  
C2 C11 H11A 109.5 . . ?  
C2 C11 H11B 109.5 . . ?  
H11A C11 H11B 109.5 . . ?  
C2 C11 H11C 109.5 . . ?  
H11A C11 H11C 109.5 . . ?  
H11B C11 H11C 109.5 . . ?  
C1 C2 C11 114(2) . . ?  
C1 C2 C3 119(2) . . ?  
C11 C2 C3 127(2) . . ?  
C6 Te2 Te1 93.9(7) . . ?  
C1 Te1 Te2 96.3(5) . . ?  
C2 C1 N1 122.5(19) . . ?  
C2 C1 Te1 121.7(16) . . ?  
N1 C1 Te1 115.7(14) . . ?  
C10 N2 C6 115(2) . . ?  
C10 N2 Zn1 116.1(15) . . ?  
C6 N2 Zn1 128.8(16) . . ?  
N2 C6 C7 124(2) . . ?  
N2 C6 Te2 114.8(18) . . ?  
C7 C6 Te2 121.0(15) . . ?  
C8 C9 C10 118.2(19) . . ?  
C8 C9 H10 120.9 . . ?  
C10 C9 H10 120.9 . . ?  
N2 C10 C9 125(2) . . ?  
N2 C10 H11 117.4 . . ?  
C9 C10 H11 117.4 . . ?

```
loop_
  _geom_torsion_atom_site_label_1
  _geom_torsion_atom_site_label_2
  _geom_torsion_atom_site_label_3
  _geom_torsion_atom_site_label_4
  _geom_torsion
  _geom_torsion_site_symmetry_1
  _geom_torsion_site_symmetry_2
  _geom_torsion_site_symmetry_3
  _geom_torsion_site_symmetry_4
  _geom_torsion_publ_flag
C9 C8 C7 C6 -1(3) . . . . ?
C9 C8 C7 C12 178(2) . . . . ?
N2 Zn1 N1 C1 29.9(19) . . . . ?
C11 Zn1 N1 C1 149.0(15) . . . . ?
C12 Zn1 N1 C1 -88.4(16) . . . . ?
N2 Zn1 N1 C5 -156.3(14) . . . . ?
C11 Zn1 N1 C5 -37.2(15) . . . . ?
C12 Zn1 N1 C5 85.3(14) . . . . ?
C1 N1 C5 C4 4(3) . . . . ?
Zn1 N1 C5 C4 -170(2) . . . . ?
N1 C5 C4 C3 -5(4) . . . . ?
C2 C3 C4 C5 3(4) . . . . ?
C4 C3 C2 C1 0(4) . . . . ?
C4 C3 C2 C11 -173(3) . . . . ?
C6 Te2 Te1 C1 109.4(8) . . . . ?
C11 C2 C1 N1 172(2) . . . . ?
C3 C2 C1 N1 -1(3) . . . . ?
C11 C2 C1 Te1 -6(3) . . . . ?
C3 C2 C1 Te1 -179.0(18) . . . . ?
C5 N1 C1 C2 -1(3) . . . . ?
Zn1 N1 C1 C2 173.1(16) . . . . ?
C5 N1 C1 Te1 177.4(14) . . . . ?
Zn1 N1 C1 Te1 -9(2) . . . . ?
Te2 Te1 C1 C2 122.2(18) . . . . ?
Te2 Te1 C1 N1 -56.0(15) . . . . ?
N1 Zn1 N2 C10 -159.6(13) . . . . ?
C11 Zn1 N2 C10 81.2(14) . . . . ?
C12 Zn1 N2 C10 -42.8(14) . . . . ?
N1 Zn1 N2 C6 25(2) . . . . ?
C11 Zn1 N2 C6 -94.0(18) . . . . ?
C12 Zn1 N2 C6 142.0(18) . . . . ?
C10 N2 C6 C7 1(3) . . . . ?
Zn1 N2 C6 C7 175.9(19) . . . . ?
C10 N2 C6 Te2 -179.7(15) . . . . ?
Zn1 N2 C6 Te2 -4(3) . . . . ?
C8 C7 C6 N2 -1(4) . . . . ?
C12 C7 C6 N2 -180(2) . . . . ?
C8 C7 C6 Te2 179.5(17) . . . . ?
C12 C7 C6 Te2 1(3) . . . . ?
Te1 Te2 C6 N2 -58.0(17) . . . . ?
Te1 Te2 C6 C7 122(2) . . . . ?
C7 C8 C9 C10 2(3) . . . . ?
C6 N2 C10 C9 1(3) . . . . ?
Zn1 N2 C10 C9 -174.8(15) . . . . ?
C8 C9 C10 N2 -3(3) . . . . ?

  _diffrn_measured_fraction_theta_max 0.999
  _diffrn_reflns_theta_full 27.51
  _diffrn_measured_fraction_theta_full 0.999
  _refine_diff_density_max 2.265
```

|                          |        |
|--------------------------|--------|
| _refine_diff_density_min | -1.169 |
| _refine_diff_density_rms | 0.247  |

### Crystal information (.cif) for [Cd(Tepy)<sub>2</sub>(tmeda)] (3)

data\_gk-11

```
_audit_creation_method          SHELXL-97
_chemical_name_systematic
;
?
;
_chemical_name_common           ?
_chemical_melting_point         ?
_chemical_formula_moiety        ?
_chemical_formula_sum           'C16 H24 Cd N4 Te2'
_chemical_formula_weight        639.99

loop_
  _atom_type_symbol
  _atom_type_description
  _atom_type_scatter_dispersion_real
  _atom_type_scatter_dispersion_imag
  _atom_type_scatter_source
  'C'  'C'  0.0033  0.0016
  'International Tables Vol C Tables 4.2.6.8 and 6.1.1.4'
  'H'  'H'  0.0000  0.0000
  'International Tables Vol C Tables 4.2.6.8 and 6.1.1.4'
  'N'  'N'  0.0061  0.0033
  'International Tables Vol C Tables 4.2.6.8 and 6.1.1.4'
  'Te' 'Te' -0.5308  1.6751
  'International Tables Vol C Tables 4.2.6.8 and 6.1.1.4'
  'Cd' 'Cd' -0.8075  1.2024
  'International Tables Vol C Tables 4.2.6.8 and 6.1.1.4'

_symmetry_cell_setting          monoclinic
_symmetry_space_group_name_H-M 'C 1 2/c 1'
_symmetry_space_group_name_Hall '-C 2yc'
_symmetry_Int_Tables_number    15

loop_
  _symmetry_equiv_pos_as_xyz
  'x, y, z'
  '-x, y, -z+1/2'
  'x+1/2, y+1/2, z'
  '-x+1/2, y+1/2, -z+1/2'
  '-x, -y, -z'
  'x, -y, z-1/2'
  '-x+1/2, -y+1/2, -z'
  'x+1/2, -y+1/2, z-1/2'

_cell_length_a                  20.900(5)
_cell_length_b                  7.3572(11)
_cell_length_c                  14.250(3)
_cell_angle_alpha               90.00
_cell_angle_beta                105.382(16)
_cell_angle_gamma               90.00
```

```
_cell_volume                2112.6(7)
_cell_formula_units_Z       4
_cell_measurement_temperature 298(2)
_cell_measurement_reflns_used 25
_cell_measurement_theta_min  10.3
_cell_measurement_theta_max  16.1

_exptl_crystal_description  'plate'
_exptl_crystal_colour       'colourless'
_exptl_crystal_size_max     0.50
_exptl_crystal_size_mid     0.10
_exptl_crystal_size_min     0.05
_exptl_crystal_density_meas ?
_exptl_crystal_density_diffrn 2.012
_exptl_crystal_density_method 'not measured'
_exptl_crystal_F_000        1200
_exptl_absorpt_coefficient_mu 3.745
_exptl_absorpt_correction_type psi-scan
_exptl_absorpt_process_details '(North, Phillips & Mathews,
1968) '
_exptl_absorpt_correction_T_min 0.2561
_exptl_absorpt_correction_T_max 0.8349

_exptl_special_details
;
?
;

_diffrn_ambient_temperature 298(2)
_diffrn_radiation_wavelength 0.71073
_diffrn_radiation_type       MoK\alpha
_diffrn_radiation_source     'fine-focus sealed tube'
_diffrn_radiation_monochromator graphite
_diffrn_measurement_device_type 'Rigaku AFC7S'
_diffrn_measurement_method   '\w'
_diffrn_detector_area_resol_mean ?
_diffrn_standards_number     3
_diffrn_standards_interval_count 150
_diffrn_standards_decay_%    -5.93
_diffrn_reflns_number        3266
_diffrn_reflns_av_R_equivalents 0.0430
_diffrn_reflns_av_sigmaI/netI 0.0401
_diffrn_reflns_limit_h_min   -15
_diffrn_reflns_limit_h_max   27
_diffrn_reflns_limit_k_min   -9
_diffrn_reflns_limit_k_max   5
_diffrn_reflns_limit_l_min   -18
_diffrn_reflns_limit_l_max   17
_diffrn_reflns_theta_min     2.95
_diffrn_reflns_theta_max     27.48
_reflns_number_total         2433
_reflns_number_gt            1920
_reflns_threshold_expression  >2sigma(I)

_computing_data_collection   'WINAFRC'
_computing_cell_refinement   'WINAFRC'
_computing_data_reduction    'CRYSTAL STRUCTURE'
```

```
_computing_structure_solution      'DIRDIF-99 FOR WINDOWS'  
_computing_structure_refinement    'SHELXL-97 (Sheldrick, 1997)'  
_computing_molecular_graphics      'ORTEP-3 FOR WINDOWS'  
_computing_publication_material    'WINGX 1.70.01'  
  
_refine_special_details  
;  
Refinement of F2 against ALL reflections. The weighted R-factor wR  
and  
goodness of fit S are based on F2, conventional R-factors R are  
based  
on F, with F set to zero for negative F2. The threshold expression  
of  
F2 > 2sigma(F2) is used only for calculating R-factors(gt) etc.  
and is  
not relevant to the choice of reflections for refinement. R-factors  
based  
on F2 are statistically about twice as large as those based on F,  
and R-  
factors based on ALL data will be even larger.  
;  
  
_refine_ls_structure_factor_coef  Fsqd  
_refine_ls_matrix_type            full  
_refine_ls_weighting_scheme       calc  
_refine_ls_weighting_details  
'calc w=1/[\s2(Fo2)+(0.0675P)2+5.1667P] where  
P=(Fo2+2Fc2)/3'  
_atom_sites_solution_primary      direct  
_atom_sites_solution_secondary    difmap  
_atom_sites_solution_hydrogens    geom  
_refine_ls_hydrogen_treatment     mixed  
_refine_ls_extinction_method      SHELXL  
_refine_ls_extinction_coef        0.0022(2)  
_refine_ls_extinction_expression  
'Fc*=kFc[1+0.001xFc2\l3/sin(2\q)]-1/4'  
_refine_ls_number_reflns          2433  
_refine_ls_number_parameters       130  
_refine_ls_number_restraints       0  
_refine_ls_R_factor_all            0.0558  
_refine_ls_R_factor_gt            0.0399  
_refine_ls_wR_factor_ref           0.1162  
_refine_ls_wR_factor_gt           0.1070  
_refine_ls_goodness_of_fit_ref     1.027  
_refine_ls_restrained_S_all        1.027  
_refine_ls_shift/su_max            0.000  
_refine_ls_shift/su_mean           0.000  
  
loop_  
_atom_site_label  
_atom_site_type_symbol  
_atom_site_fract_x  
_atom_site_fract_y  
_atom_site_fract_z  
_atom_site_U_iso_or_equiv  
_atom_site_adp_type  
_atom_site_occupancy  
_atom_site_symmetry_multiplicity
```

```
_atom_site_calc_flag
_atom_site_refinement_flags
_atom_site_disorder_assembly
_atom_site_disorder_group
Te1 Te 0.068585(19) 0.06759(6) 0.12299(3) 0.04847(18) Uani 1 1 d . . .
Cd1 Cd 0.0000 0.20270(7) 0.2500 0.0415(2) Uani 1 2 d S . .
N1 N 0.1290(3) 0.0419(7) 0.3348(4) 0.0539(12) Uani 1 1 d . . .
N2 N 0.0614(3) 0.4632(7) 0.3348(4) 0.0578(14) Uani 1 1 d . . .
C1 C 0.1435(3) 0.0097(8) 0.2512(4) 0.0445(12) Uani 1 1 d . . .
C2 C 0.2046(4) -0.0617(11) 0.2492(6) 0.067(2) Uani 1 1 d . . .
C5 C 0.1749(4) 0.0070(13) 0.4178(6) 0.074(2) Uani 1 1 d . . .
C4 C 0.2374(4) -0.0573(13) 0.4205(7) 0.082(3) Uani 1 1 d . . .
C7 C 0.1242(3) 0.4943(11) 0.3083(6) 0.0688(19) Uani 1 1 d . . .
H7A H 0.1150 0.5107 0.2391 0.103 Uiso 1 1 calc R . .
H7B H 0.1528 0.3913 0.3276 0.103 Uiso 1 1 calc R . .
H7C H 0.1455 0.6011 0.3408 0.103 Uiso 1 1 calc R . .
C3 C 0.2518(4) -0.0932(14) 0.3351(8) 0.085(3) Uani 1 1 d . . .
C8 C 0.0166(4) 0.6193(11) 0.3029(8) 0.094(3) Uani 1 1 d . . .
C6 C 0.0743(5) 0.4382(13) 0.4396(7) 0.089(3) Uani 1 1 d . . .
H6A H 0.1035 0.3363 0.4596 0.133 Uiso 1 1 calc R . .
H6B H 0.0333 0.4160 0.4558 0.133 Uiso 1 1 calc R . .
H6C H 0.0948 0.5457 0.4725 0.133 Uiso 1 1 calc R . .
H1 H 0.211(4) -0.079(11) 0.197(6) 0.07(3) Uiso 1 1 d . . .
H3 H 0.263(5) -0.067(12) 0.479(8) 0.11(4) Uiso 1 1 d . . .
H8B H -0.020(4) 0.597(9) 0.337(5) 0.06(2) Uiso 1 1 d . . .
H4 H 0.163(4) 0.045(10) 0.480(6) 0.08(2) Uiso 1 1 d . . .
H8A H 0.044(4) 0.745(12) 0.326(6) 0.09(2) Uiso 1 1 d . . .
H2 H 0.286(5) -0.143(14) 0.334(7) 0.10(3) Uiso 1 1 d . . .
```

```
loop_
_atom_site_aniso_label
_atom_site_aniso_U_11
_atom_site_aniso_U_22
_atom_site_aniso_U_33
_atom_site_aniso_U_23
_atom_site_aniso_U_13
_atom_site_aniso_U_12
Te1 0.0441(3) 0.0541(3) 0.0495(3) -0.00150(15) 0.01645(17) 0.00397(16)
Cd1 0.0394(3) 0.0350(3) 0.0544(3) 0.000 0.0198(2) 0.000
N1 0.052(3) 0.060(3) 0.053(3) 0.003(2) 0.021(2) 0.003(3)
N2 0.045(3) 0.048(3) 0.084(4) -0.023(3) 0.023(3) -0.008(2)
C1 0.039(3) 0.039(3) 0.059(3) 0.005(2) 0.019(2) -0.003(2)
C2 0.047(4) 0.082(5) 0.077(5) 0.013(4) 0.025(3) 0.018(3)
C5 0.078(5) 0.083(5) 0.060(4) 0.009(4) 0.017(4) -0.001(5)
C4 0.061(5) 0.088(6) 0.083(6) 0.032(5) -0.006(4) -0.005(4)
C7 0.050(4) 0.051(4) 0.108(6) -0.012(4) 0.025(4) -0.015(3)
C3 0.038(4) 0.092(6) 0.124(8) 0.037(5) 0.019(4) 0.016(4)
C8 0.061(5) 0.041(4) 0.179(10) -0.034(5) 0.027(6) 0.003(3)
C6 0.078(6) 0.099(7) 0.094(6) -0.050(5) 0.030(5) -0.017(5)
```

\_geom\_special\_details

;

All esds (except the esd in the dihedral angle between two l.s. planes) are estimated using the full covariance matrix. The cell esds are taken into account individually in the estimation of esds in distances, angles

and torsion angles; correlations between esds in cell parameters are only used when they are defined by crystal symmetry. An approximate (isotropic) treatment of cell esds is used for estimating esds involving l.s. planes.

;

```
loop_
  _geom_bond_atom_site_label_1
  _geom_bond_atom_site_label_2
  _geom_bond_distance
  _geom_bond_site_symmetry_2
  _geom_bond_publ_flag
Te1 C1 2.111(6) . ?
Te1 Cd1 2.7739(6) . ?
Cd1 N2 2.441(5) . ?
Cd1 N2 2.441(5) 2 ?
Cd1 Te1 2.7739(6) 2 ?
N1 C1 1.326(7) . ?
N1 C5 1.336(10) . ?
N2 C6 1.457(11) . ?
N2 C8 1.475(10) . ?
N2 C7 1.477(8) . ?
C1 C2 1.389(8) . ?
C2 C3 1.372(12) . ?
C2 H1 0.80(7) . ?
C5 C4 1.379(12) . ?
C5 H4 1.02(8) . ?
C4 C3 1.355(14) . ?
C4 H3 0.86(11) . ?
C7 H7A 0.9600 . ?
C7 H7B 0.9600 . ?
C7 H7C 0.9600 . ?
C3 H2 0.81(10) . ?
C8 C8 1.48(2) 2 ?
C8 H8B 1.02(6) . ?
C8 H8A 1.09(9) . ?
C6 H6A 0.9600 . ?
C6 H6B 0.9600 . ?
C6 H6C 0.9600 . ?
```

```
loop_
  _geom_angle_atom_site_label_1
  _geom_angle_atom_site_label_2
  _geom_angle_atom_site_label_3
  _geom_angle
  _geom_angle_site_symmetry_1
  _geom_angle_site_symmetry_3
  _geom_angle_publ_flag
C1 Te1 Cd1 84.28(15) . . ?
N2 Cd1 N2 76.5(3) . 2 ?
N2 Cd1 Te1 104.67(13) . 2 ?
N2 Cd1 Te1 108.04(12) 2 2 ?
N2 Cd1 Te1 108.04(12) . . ?
N2 Cd1 Te1 104.67(13) 2 . ?
Te1 Cd1 Te1 138.00(3) 2 . ?
C1 N1 C5 118.7(6) . . ?
```



C6 N2 C8 110.1(7) . . ?  
C6 N2 C7 110.3(6) . . ?  
C8 N2 C7 109.6(7) . . ?  
C6 N2 Cd1 109.8(4) . . ?  
C8 N2 Cd1 104.6(5) . . ?  
C7 N2 Cd1 112.4(4) . . ?  
N1 C1 C2 121.1(6) . . ?  
N1 C1 Te1 116.6(4) . . ?  
C2 C1 Te1 122.2(5) . . ?  
C3 C2 C1 119.5(8) . . ?  
C3 C2 H1 123(6) . . ?  
C1 C2 H1 118(6) . . ?  
N1 C5 C4 122.8(8) . . ?  
N1 C5 H4 115(5) . . ?  
C4 C5 H4 121(5) . . ?  
C3 C4 C5 118.5(8) . . ?  
C3 C4 H3 129(7) . . ?  
C5 C4 H3 113(7) . . ?  
N2 C7 H7A 109.5 . . ?  
N2 C7 H7B 109.5 . . ?  
H7A C7 H7B 109.5 . . ?  
N2 C7 H7C 109.5 . . ?  
H7A C7 H7C 109.5 . . ?  
H7B C7 H7C 109.5 . . ?  
C4 C3 C2 119.3(8) . . ?  
C4 C3 H2 121(7) . . ?  
C2 C3 H2 119(7) . . ?  
N2 C8 C8 113.6(7) . 2 ?  
N2 C8 H8B 103(4) . . ?  
C8 C8 H8B 106(4) 2 . ?  
N2 C8 H8A 109(4) . . ?  
C8 C8 H8A 112(4) 2 . ?  
H8B C8 H8A 113(6) . . ?  
N2 C6 H6A 109.5 . . ?  
N2 C6 H6B 109.5 . . ?  
H6A C6 H6B 109.5 . . ?  
N2 C6 H6C 109.5 . . ?  
H6A C6 H6C 109.5 . . ?  
H6B C6 H6C 109.5 . . ?

loop\_

\_geom\_torsion\_atom\_site\_label\_1  
\_geom\_torsion\_atom\_site\_label\_2  
\_geom\_torsion\_atom\_site\_label\_3  
\_geom\_torsion\_atom\_site\_label\_4  
\_geom\_torsion  
\_geom\_torsion\_site\_symmetry\_1  
\_geom\_torsion\_site\_symmetry\_2  
\_geom\_torsion\_site\_symmetry\_3  
\_geom\_torsion\_site\_symmetry\_4  
\_geom\_torsion\_publ\_flag  
C1 Te1 Cd1 N2 64.2(2) . . . . ?  
C1 Te1 Cd1 N2 144.5(2) . . . 2 ?  
C1 Te1 Cd1 Te1 -75.18(15) . . . 2 ?  
N2 Cd1 N2 C6 132.3(6) 2 . . . ?  
Te1 Cd1 N2 C6 26.9(5) 2 . . . ?  
Te1 Cd1 N2 C6 -126.4(5) . . . . ?  
N2 Cd1 N2 C8 14.2(5) 2 . . . ?

Te1 Cd1 N2 C8 -91.2(6) 2 . . . ?  
Te1 Cd1 N2 C8 115.5(5) . . . ?  
N2 Cd1 N2 C7 -104.6(6) 2 . . . ?  
Te1 Cd1 N2 C7 149.9(5) 2 . . . ?  
Te1 Cd1 N2 C7 -3.3(5) . . . ?  
C5 N1 C1 C2 1.0(10) . . . ?  
C5 N1 C1 Te1 179.9(6) . . . ?  
Cd1 Te1 C1 N1 4.9(4) . . . ?  
Cd1 Te1 C1 C2 -176.2(6) . . . ?  
N1 C1 C2 C3 -2.4(11) . . . ?  
Te1 C1 C2 C3 178.8(6) . . . ?  
C1 N1 C5 C4 1.5(12) . . . ?  
N1 C5 C4 C3 -2.6(14) . . . ?  
C5 C4 C3 C2 1.1(14) . . . ?  
C1 C2 C3 C4 1.3(13) . . . ?  
C6 N2 C8 C8 -161.1(9) . . . 2 ?  
C7 N2 C8 C8 77.5(10) . . . 2 ?  
Cd1 N2 C8 C8 -43.2(10) . . . 2 ?

\_diffn\_measured\_fraction\_theta\_max 1.000  
\_diffn\_reflns\_theta\_full 27.48  
\_diffn\_measured\_fraction\_theta\_full 1.000  
\_refine\_diff\_density\_max 1.536  
\_refine\_diff\_density\_min -0.834  
\_refine\_diff\_density\_rms 0.146
